# Supplementary material for: Nature of Bimetallic Oxide Sb2MoO6/rGO Anode for High‐Performance Potassium‐Ion Batteries
Source: PubMed Central journal article supplement (PMC6724349; doi:10.1002/advs.201900904), 2019-06-18
Supplement: ADVS-6-1900904-s001.pdf [file ADVS-6-1900904-s001.pdf]

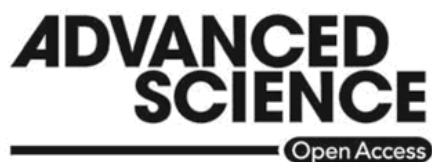

## Supporting Information

for *Adv. Sci.*, DOI: 10.1002/advs.201900904

Nature of Bimetallic Oxide  $\text{Sb}_2\text{MoO}_6/\text{rGO}$  Anode  
for High-Performance Potassium-Ion Batteries

*Jue Wang, Bin Wang, Zhaomeng Liu, Ling Fan, Qingfeng  
Zhang, Hongbo Ding, Longlu Wang, Hongguan Yang, Xinzhi  
Yu, and Bingan Lu\**

Supporting Information

**Nature of Bimetallic Oxide  $\text{Sb}_2\text{MoO}_6/\text{rGO}$  Anode for High-Performance Potassium Ion Batteries**

*Jue Wang, Bin Wang, Zhaomeng Liu, Ling Fan, Qingfeng Zhang, Hongbo Ding, Longlu Wang, Hongguan Yang, Xinzhi Yu, and Bingan Lu\**

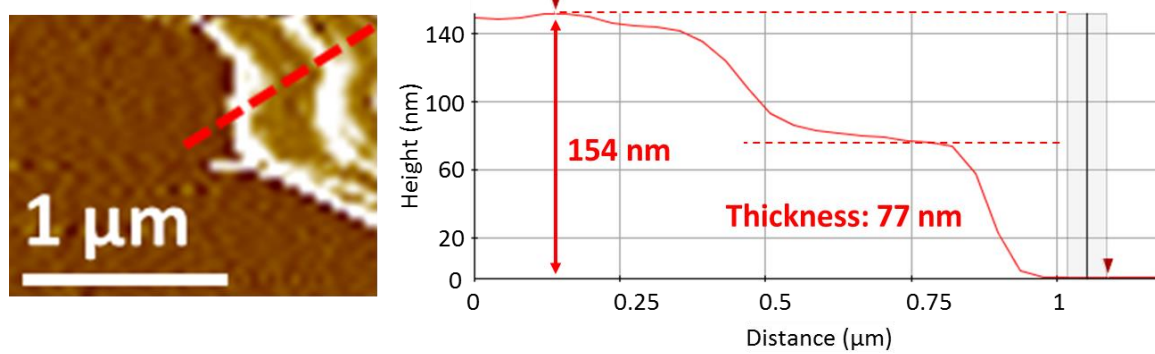

**Figure S1.** AFM image and the corresponding height profile of  $\text{Sb}_2\text{MoO}_6$  nanoplates.

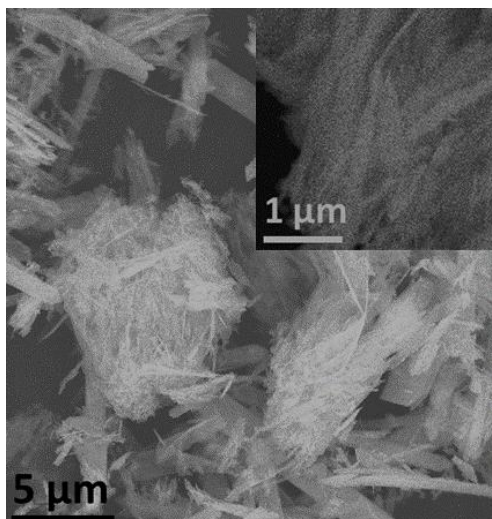

**Figure S2.** SEM images of Sb<sub>2</sub>MoO<sub>6</sub> synthesized without the addition of GO during the synthesis.

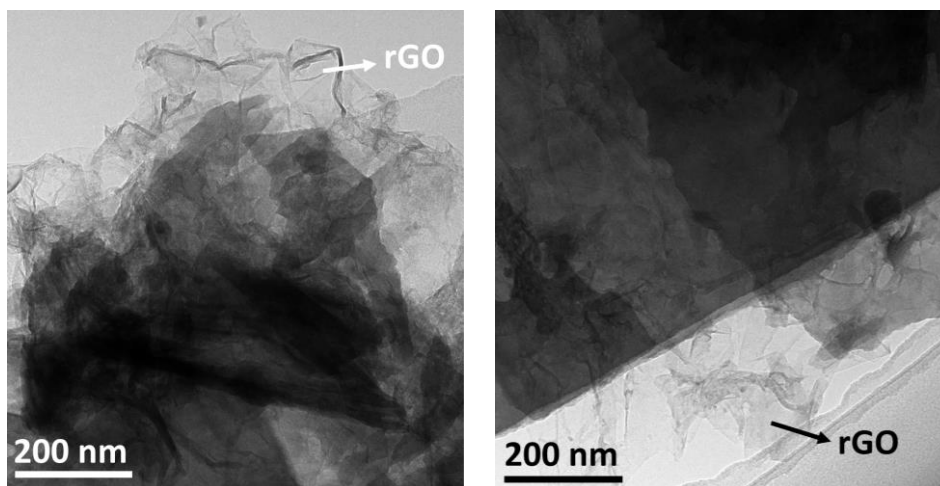

**Figure S3.** TEM images of  $\text{Sb}_2\text{MoO}_6$  nanoplates with rGO nanosheets.

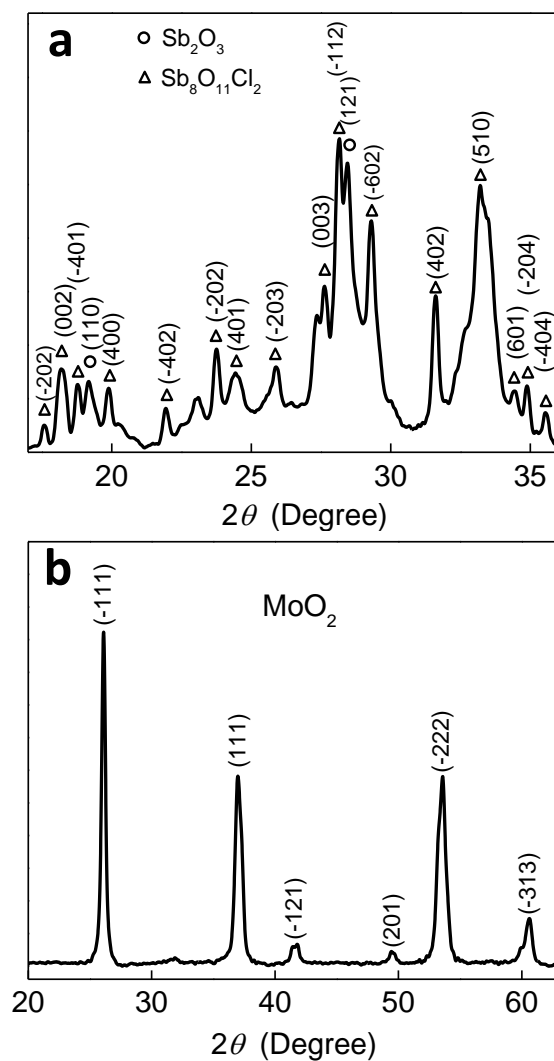

**Figure S4.** XRD patterns of a) Sb-based counterpart ( $\text{Sb}_2\text{O}_3/\text{Sb}_8\text{O}_{11}\text{Cl}_2/\text{rGO}$ ) and b) Mo-based counterpart ( $\text{MoO}_2/\text{rGO}$ ).

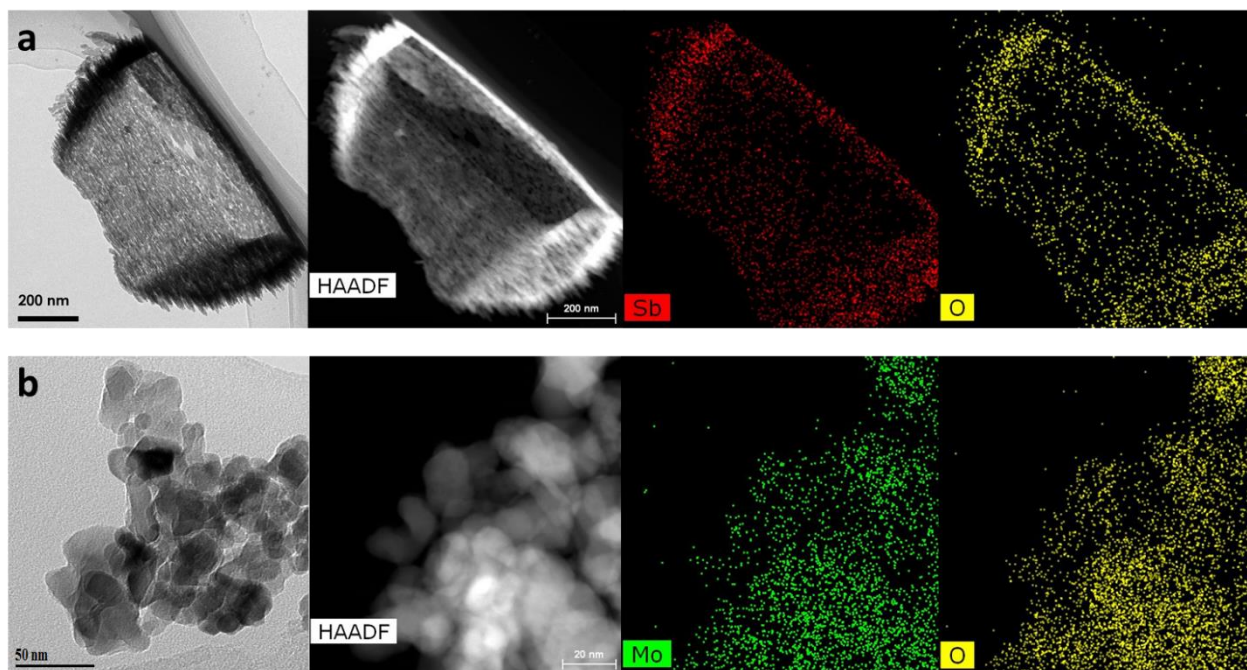

**Figure S5.** TEM images, HAADF-STEM images, and EDS mappings of a)  $\text{Sb}_2\text{O}_3/\text{Sb}_8\text{O}_{11}\text{Cl}_2$  nanoplate/rGO and b)  $\text{MoO}_2$  nanoplate/rGO.

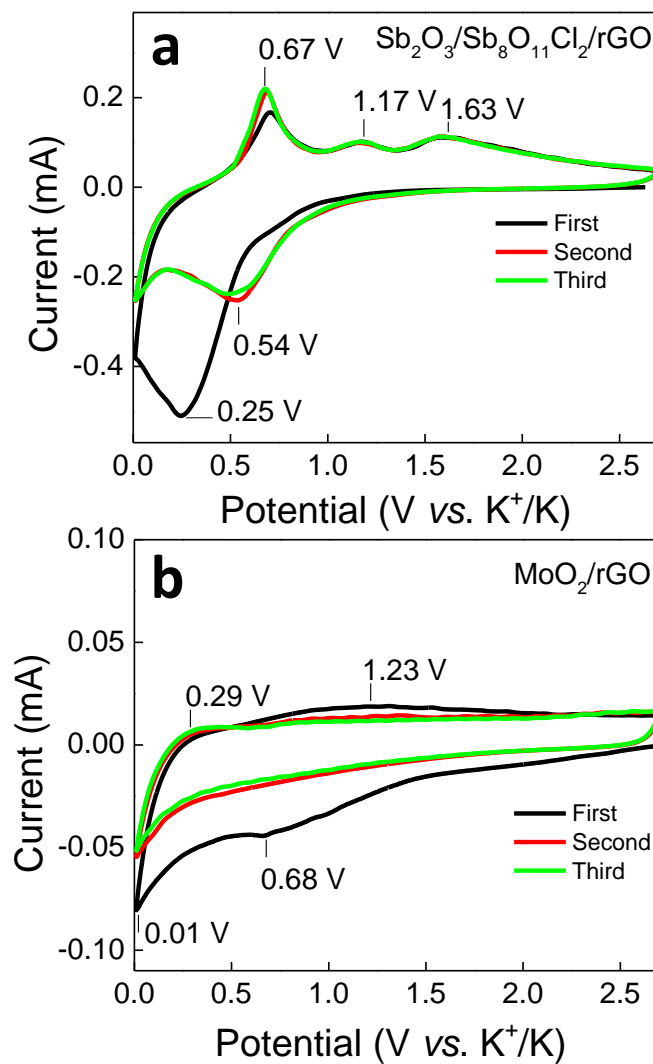

**Figure S6.** CV curves of a) Sb<sub>2</sub>O<sub>3</sub>/Sb<sub>8</sub>O<sub>11</sub>Cl<sub>2</sub>/rGO and b) MoO<sub>2</sub>/rGO.



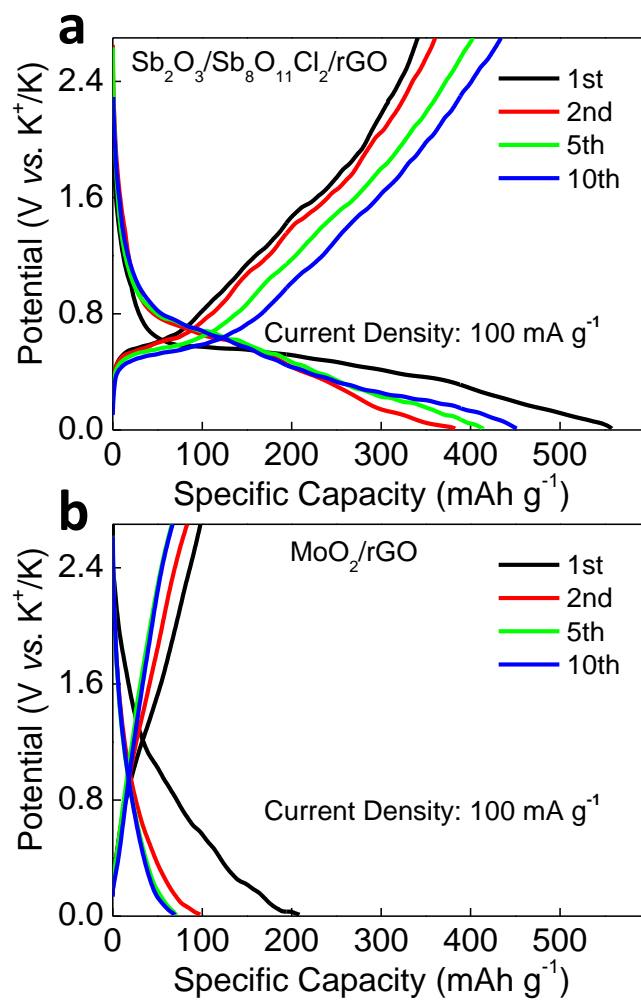

**Figure S7.** Charge/discharge profiles of a)  $\text{Sb}_2\text{O}_3/\text{Sb}_8\text{O}_{11}\text{Cl}_2/\text{rGO}$  and b)  $\text{MoO}_2/\text{rGO}$ .

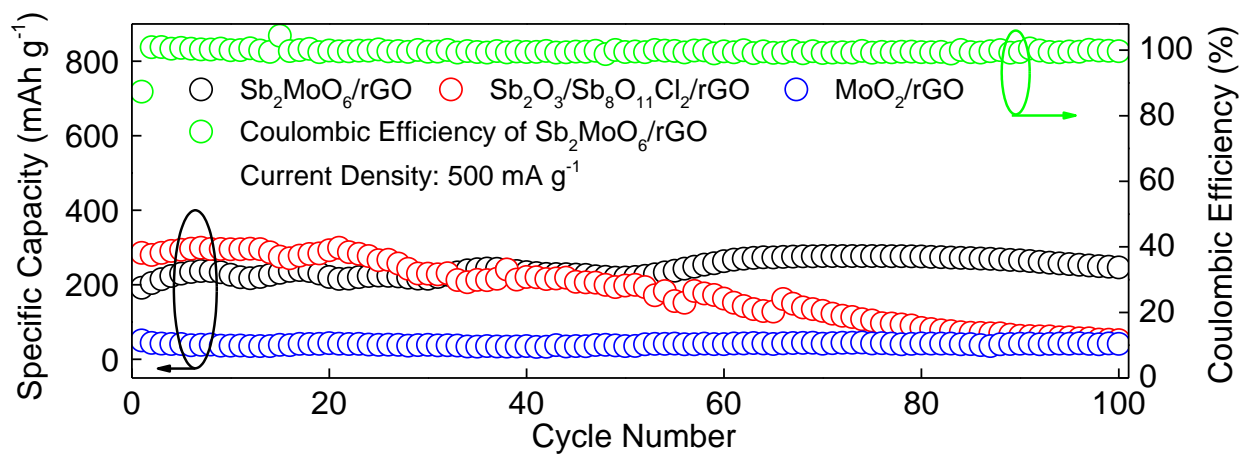

**Figure S8.** Cycling performance of  $\text{Sb}_2\text{MoO}_6/\text{rGO}$ ,  $\text{Sb}_2\text{O}_3/\text{Sb}_8\text{O}_{11}\text{Cl}_2/\text{rGO}$ , and  $\text{MoO}_2/\text{rGO}$  at  $500 \text{ mA g}^{-1}$ .

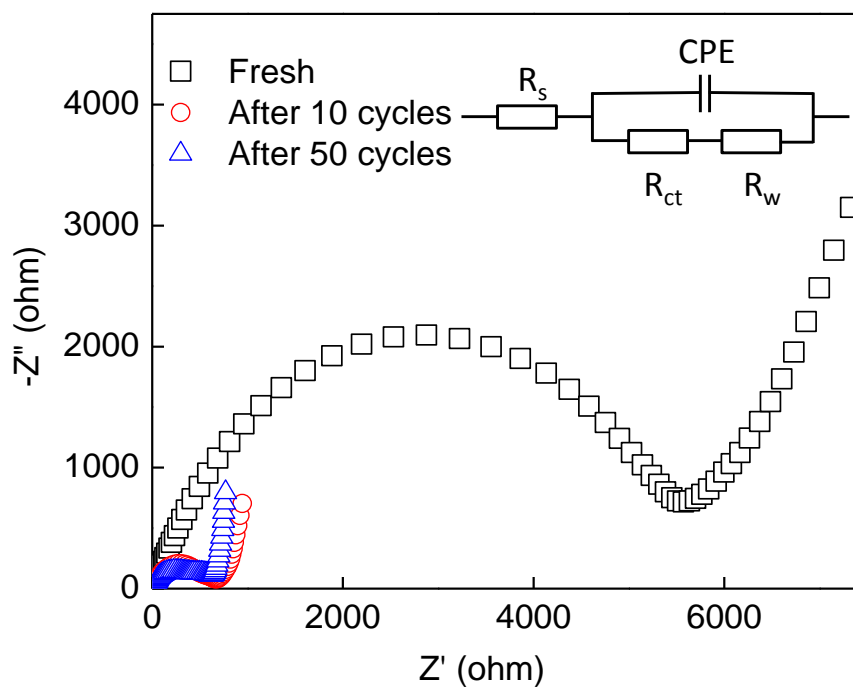

**Figure S9.** Nyquist plots of the  $\text{Sb}_2\text{MoO}_6/\text{rGO}$  electrode, which is fresh, after 10 cycles at  $500 \text{ mA g}^{-1}$ , and after 50 cycles at  $500 \text{ mA g}^{-1}$ , with the equivalent-circuit model inside.

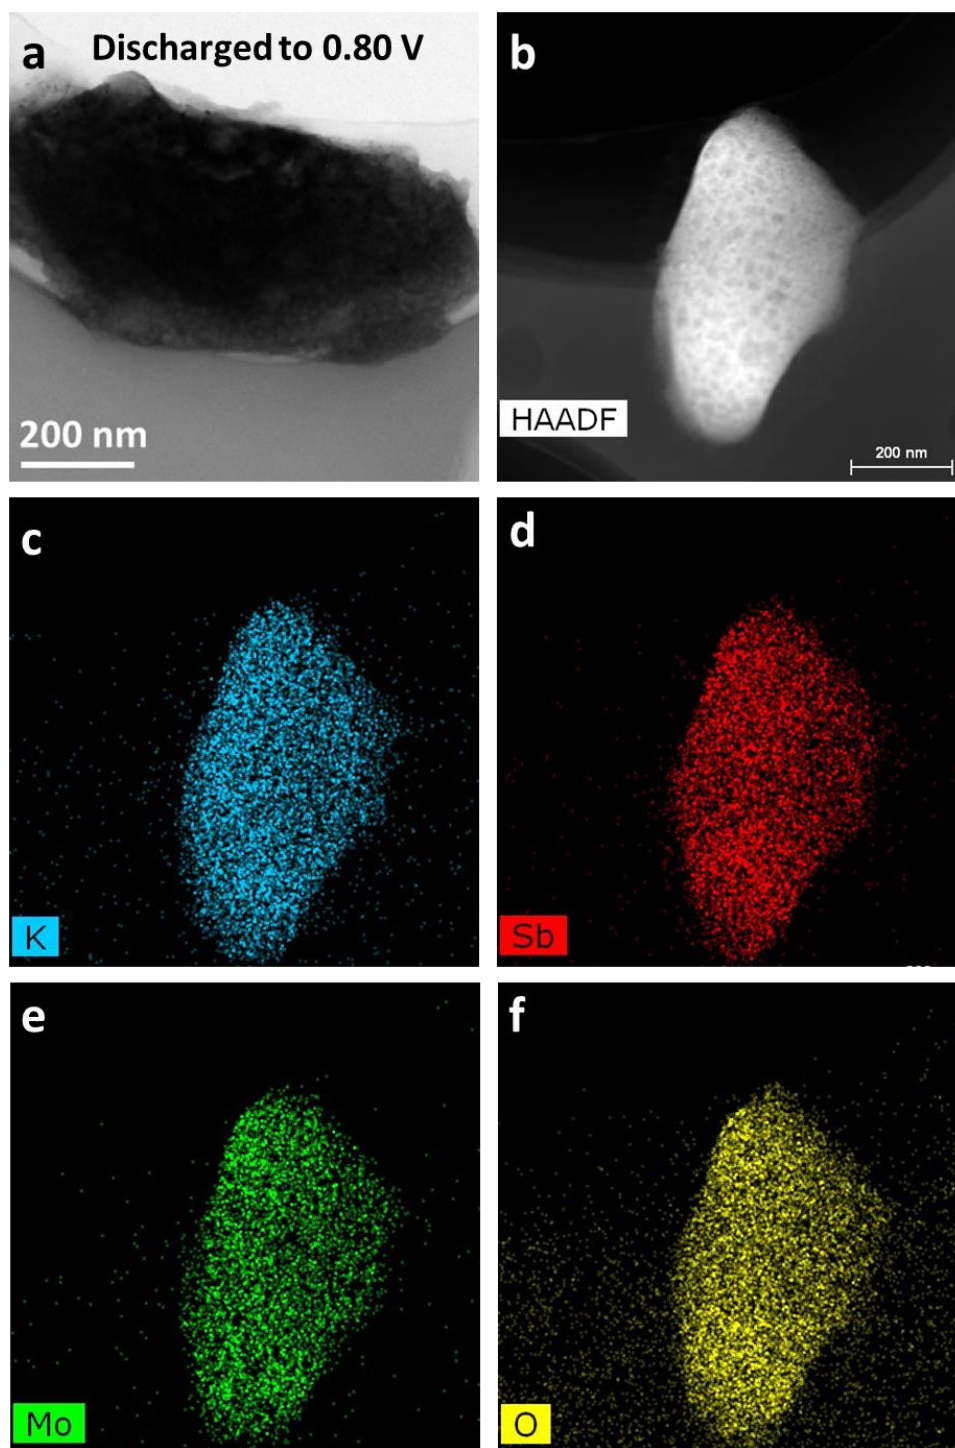

**Figure S10.** a) TEM image, b) HAADF-STEM image, and c–f) EDS mappings of  $\text{Sb}_2\text{MoO}_6$  nanoplate being discharged to 0.80 V.

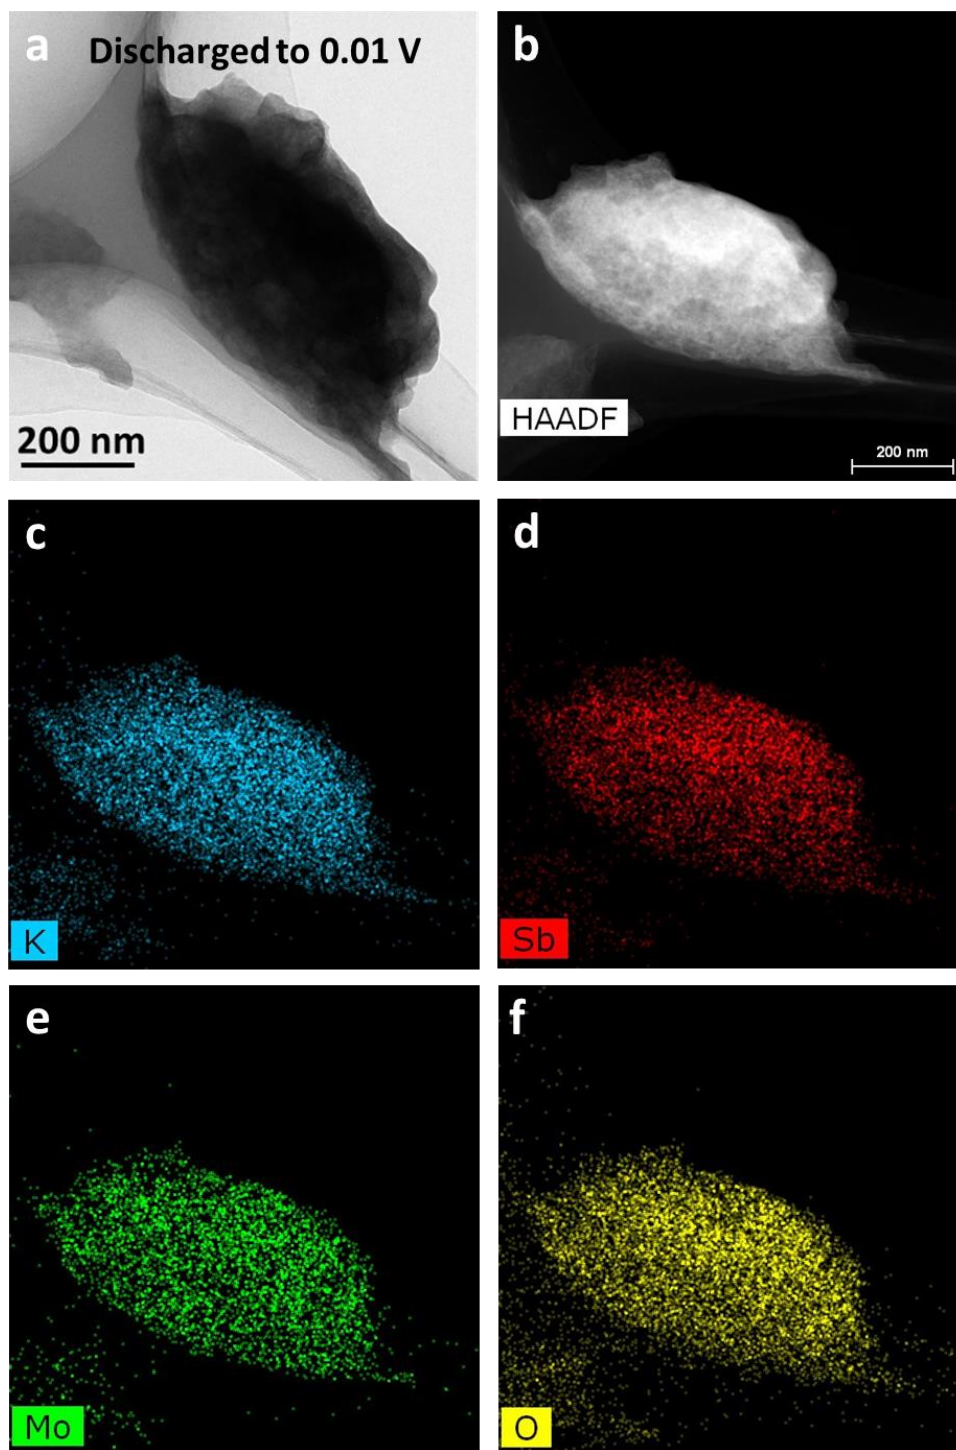

**Figure S11.** . a) TEM image, b) HAADF-STEM image, and c–f) EDS mappings of  $\text{Sb}_2\text{MoO}_6$  nanoplate being discharged to 0.01 V.

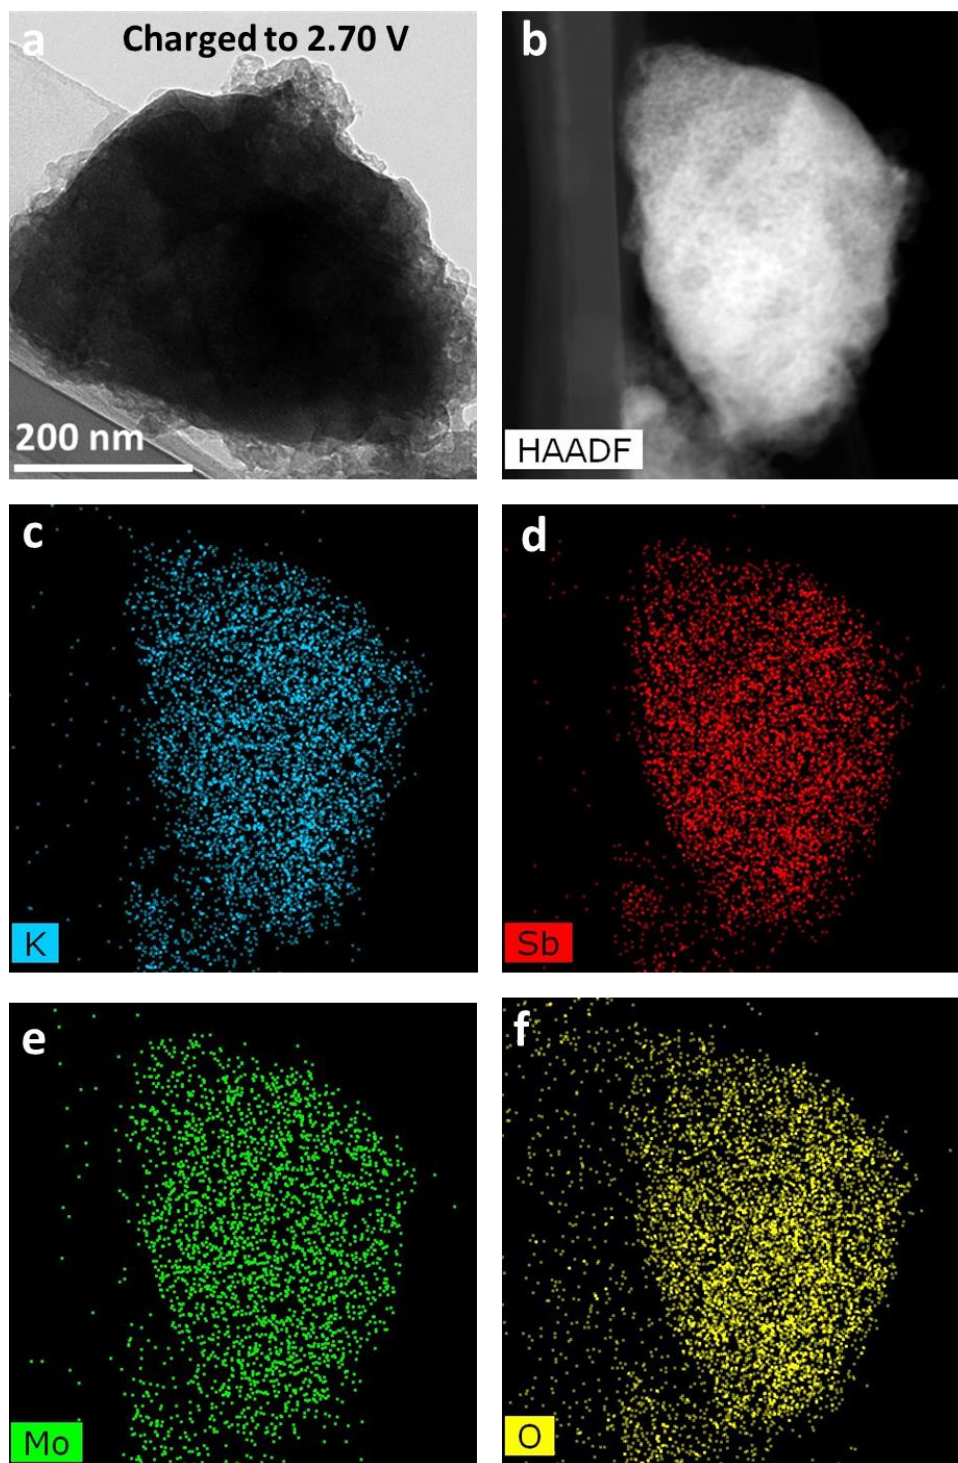

**Figure S12.** a) TEM image, b) HAADF-STEM image, and c–f) EDS mappings of  $\text{Sb}_2\text{MoO}_6$  nanoplate being charged to 2.70 V.
